# Supplementary material
Source: HighWire-hosted journal article supplement (https://jnm.snmjournals.org/highwire/filestream/101989/field_highwire_adjunct_files/0/Newsline_Supplemental_Data.pdf)
Supplement: Newsline_Supplemental_Data.pdf [file Newsline_Supplemental_Data.pdf]

**SUPPLEMENTAL TABLE 1**  
**Respondents' Top 3 Concerns/Issues, by Radiopharmaceutical Therapy**

| Radiopharmaceutical Therapy                                                  | Percentage (n) |
|------------------------------------------------------------------------------|----------------|
| Oral <sup>131</sup> I (≤33 mCi)                                              |                |
| Referring physicians prefer to manage patients.                              | 35% (33)       |
| I have concerns about the radiation safety.                                  | 30% (28)       |
| Provides poor payment for the time and effort in the administration process. | 26% (24)       |
| Oral <sup>131</sup> I (>33 mCi)                                              |                |
| I have concerns about the radiation safety.                                  | 40% (38)       |
| I have concerns about the dosimetry procedures.                              | 39% (37)       |
| There might be unexpected late side effects.                                 | 33% (31)       |
| <sup>223</sup> Ra (Xofigo)                                                   |                |
| Treatment is too expensive.                                                  | 44% (43)       |
| Referring physicians prefer to manage treatment.                             | 21% (21)       |
| Provides poor payment for the time and effort in the administration process. | 20% (20)       |
| <sup>90</sup> Y-microspheres (SIRSpheeres and TheraSpheres)                  |                |
| Treatment is too expensive.                                                  | 41% (39)       |
| I have concerns about the dosimetry procedure.                               | 30% (28)       |
| I am not adequately trained to be comfortable administering this treatment.  | 30% (28)       |
| <sup>177</sup> Lu-DOTATATE (Lutathera)                                       |                |
| Treatment is too expensive.                                                  | 55% (52)       |
| I have concerns about the dosimetry procedure.                               | 24% (23)       |
| There might be unexpected late side effects.                                 | 21% (20)       |
| <sup>131</sup> I-MIBG (Azedra or generic)                                    |                |
| Treatment is too expensive.                                                  | 33% (30)       |
| I have concerns about the radiation safety.                                  | 32% (29)       |
| I have concerns about the dosimetry procedure.                               | 28% (25)       |
| <sup>90</sup> Y anti-CD 20 (Zevalin)                                         |                |
| Treatment is too expensive.                                                  | 42% (36)       |
| Referring physicians prefer to manage treatment.                             | 35% (30)       |
| Provides poor payment for the time and effort in the administration process. | 20% (17)       |
| <sup>153</sup> Sm-EDTMP (Quadramet) or <sup>89</sup> Sr (Metastron)          |                |
| Referring physicians prefer to manage treatment.                             | 37% (31)       |
| There might be unexpected late side effects.                                 | 27% (23)       |
| Treatment does not have enough reported randomized studies.                  | 19% (16)       |
| Prostate radionuclide therapy                                                |                |
| I don't have sufficient information about this procedure.                    | 34% (30)       |
| Treatment does not have enough reported randomized studies.                  | 30% (27)       |
| I have concerns about the radiation safety.                                  | 19% (17)       |
| Radionuclide therapy for joints                                              |                |
| I don't have sufficient information about this procedure.                    | 43% (38)       |
| I am not adequately trained to be comfortable administering this treatment.  | 35% (31)       |
| Referring physicians prefer to manage treatment.                             | 22% (19)       |
